# Supplementary material for: ALK fusions in the pan-cancer setting: another tumor-agnostic target?
Source: PubMed Central journal article supplement (PMC10542332; doi:10.1038/s41698-023-00449-x), 2023-09-29
Supplement: 41698_2023_449_MOESM1_ESM.pdf [file 41698_2023_449_MOESM1_ESM.pdf]

**Supplemental Table 1. Examples of key studies of targeted therapies in ALK-altered NSCLC (see Table 4 for ALK-altered cancers other than NSCLC)**

| ALK inhibitors                                                                          | FDA approval                     | Control arm                            | Line of treatment | Examples of targets (IC50)<br>Selleckchem.com                                                                                           | Clinical indications                                                                                                                                                            | Median PFS                                                              | Clinical trials                                                             |
|-----------------------------------------------------------------------------------------|----------------------------------|----------------------------------------|-------------------|-----------------------------------------------------------------------------------------------------------------------------------------|---------------------------------------------------------------------------------------------------------------------------------------------------------------------------------|-------------------------------------------------------------------------|-----------------------------------------------------------------------------|
| Crizotinib                                                                              | 2011<br><br>Accelerated approval | No control arm in PROFILE 1005         | Second            | ALK (24nm), ROS1 (<0.025), and c-MET (11nm)                                                                                             | Unresectable/metastatic disease ALK-altered NSCLC after failure of ≥1 lines of treatment                                                                                        | 8.1 months                                                              | PROFILE1005 <sup>(111)</sup> (Phase II)                                     |
| Crizotinib                                                                              |                                  | Platinum +pemetrexed (in PROFILE 1014) | First             | ALK (24nm), ROS1 (<0.025), and c-MET (11nm)                                                                                             | Unresectable/metastatic NSCLC (ALK-altered) chemotherapy naïve                                                                                                                  | 10.9 vs 7 months                                                        | PROFILE 1014(Phase III) <sup>(113)</sup>                                    |
| Crizotinib                                                                              | 2013<br>Full approval            | Docetaxel/pemetrexed                   | Second            | ALK (24nm), ROS1(<0.025), and c-MET (11nm)                                                                                              | unresectable/metastatic NSCLC (ALK-altered) previously treated with platinum-based chemotherapy                                                                                 | 7.7 vs 3 months                                                         | PROFILE 1007(Phase III) <sup>(114)</sup>                                    |
| Ceritinib                                                                               | 2017                             | Platinum                               | First             | ALK(0.2nM), IGF-1R (8nM), InsR (7nM), and STK22D (23nM)                                                                                 | Unresectable/metastatic NSCLC with ALK-altered tumors                                                                                                                           | 16.6 vs 8.1 months                                                      | ASCEND 4(Phase III) <sup>(118)</sup>                                        |
| Ceritinib                                                                               | 2014                             | Single-arm studies                     | Second            | ALK(0.2nM), IGF-1R (8nM), InsR (7nM), and STK22D (23nM)                                                                                 | unresectable/metastatic NSCLC (ALK-altered) prior exposure to crizotinib                                                                                                        | 6.9 months in patients who had prior exposure to crizotinib in ASCEND 1 | ASCEND 1 (Phase I) <sup>(119)</sup><br>ASCEND 2 (Phase II) <sup>(122)</sup> |
| Ceritinib                                                                               |                                  | Pemetrexed or docetaxel                | Second            | ALK, IGF-1R, InsR, and ROS1                                                                                                             | Unresectable/metastatic NSCLC (ALK-altered) that have progressed on chemotherapy and crizotinib                                                                                 | 5.4 vs 1.6 months                                                       | ASCEND 5(Phase III) <sup>(116)</sup>                                        |
| Ensartinib                                                                              | Approved in First line in China  | Crizotinib                             | First             | MET, Axl, ABL, EPHA2, LTK, ROS1, and SLK                                                                                                | Unresectable/metastatic NSCLC (ALK-altered)                                                                                                                                     | 25.8 vs 12.7 months                                                     | eXalt3 (Phase III) <sup>(123)</sup>                                         |
| Brigatinib                                                                              | 2020                             | Crizotinib                             | First             | ALK (0.6 nM) and ROS1 (0.9 nM), also inhibits IGF-1R, and FLT-3 as well as EGFR deletion and point mutations.                           | ALK-altered unresectable/metastatic NSCLC                                                                                                                                       | 24 vs 11 months                                                         | ALTA-1L(Phase III) <sup>(121)</sup>                                         |
| Brigatinib<br><br>Oral brigatinib 90 mg once daily (arm A) or 180 mg once daily (arm B) | 2017                             | Single arm study                       | Second            | ALK (0.6 nM) and ROS1 (0.9 nM), also inhibits IGF-1R, and FLT-3 as well as EGFR deletion and point mutations.                           | Crizotinib-pretreated unresectable/metastatic ALK-altered NSCLC patients                                                                                                        | 9.2months in arm A and 16.7 months in arm B                             | ALTA (Phase II) <sup>(124)</sup>                                            |
| Alectinib                                                                               | 2017                             | Crizotinib                             | First             | ALK (1.9nM) and RET (4.8nM) with CNS activity.                                                                                          | ALK-altered unresectable/metastatic NSCLC                                                                                                                                       | 34.8 vs 10.9 months                                                     | ALEX (Phase III) <sup>(120)</sup>                                           |
| Alectinib                                                                               | 2015                             | Single arm study                       | Second            | ALK(1.9nM) and RET (4.8nm) with CNS activity.                                                                                           | Crizotinib-pretreated or intolerant unresectable/metastatic NSCLC                                                                                                               | 8.1 months                                                              | NP28761 (NCT01871805) <sup>(115)</sup>                                      |
| Alectinib                                                                               |                                  | Pemetrexed or Docetaxel                | Second            | ALK(1.9nM) and RET (4.8nm) with CNS activity.                                                                                           | Crizotinib-pretreated or intolerant unresectable/metastatic NSCLC                                                                                                               | 7.1months vs 1.6 months                                                 | ALUR (Phase III) <sup>(127)</sup>                                           |
| Lorlatinib (3 <sup>rd</sup> generation)                                                 |                                  | Crizotinib                             | First             | ALK wild type (<0.07 nM), ROS1(<0.02 nM), ALK (L1196M) (0.7nM) as well as inhibits TYK1, FER, FPS, TRKA, TRKB, TRKC, FAK, FAK2, and ACK | ALK-altered unresectable/metastatic NSCLC ALK inhibitor naïve                                                                                                                   | Not evaluable vs 9.3 months                                             | CROWN (Phase III) <sup>(117)</sup>                                          |
| Lorlatinib (3 <sup>rd</sup> generation)                                                 | 2018                             | Single arm study                       | Second/Third      | ALK wild type (<0.07 nM), ROS1(<0.02 nM), ALK (L1196M) (0.7nM) as well as inhibits TYK1, FER, FPS, TRKA, TRKB, TRKC, FAK, FAK2, and ACK | ALK-altered unresectable/metastatic NSCLC whose disease progressed on crizotinib and at least one other ALK inhibitor or alectinib or ceritinib used as the first ALK inhibitor | Not reported                                                            | B7461001 (Phase II) <sup>(112, 125)</sup>                                   |
| Entrectinib<br><br>FDA approved in 2019 for NTRK fusions and ROS1 fusions only          | No                               | Single arm study                       | First-line        | (Trk) A/B/C, ROS1, NTRK, and ALK                                                                                                        | Solid tumors with rearrangements of the TRK family, ROS1, or ALK.                                                                                                               | Median PFS of 8.3 months in 7/27 ALK naïve patients in these 2 studies  | Alka-372-001 STARTRK-1 <sup>(126)</sup>                                     |

Abbreviations: anaplastic lymphoma kinase tyrosine kinase inhibitors (ALK INHIBITORS); central nervous system (CNS); epidermal growth factor receptor (EGFR); mesenchymal-epithelial transition factor (MET); non-small-cell lung cancer (NSCLC); neurotrophic tyrosine receptor kinase (NTRK); the insulin-like growth factor-1 receptor (IGF1R); rearranged during transfection (RET); c-ros oncogene 1 (ROS1); tropomyosin receptor kinases A/B/C (Trk A/B/C).
